# Supplementary material
Source: PubMed Central journal article supplement (PMC6115289)

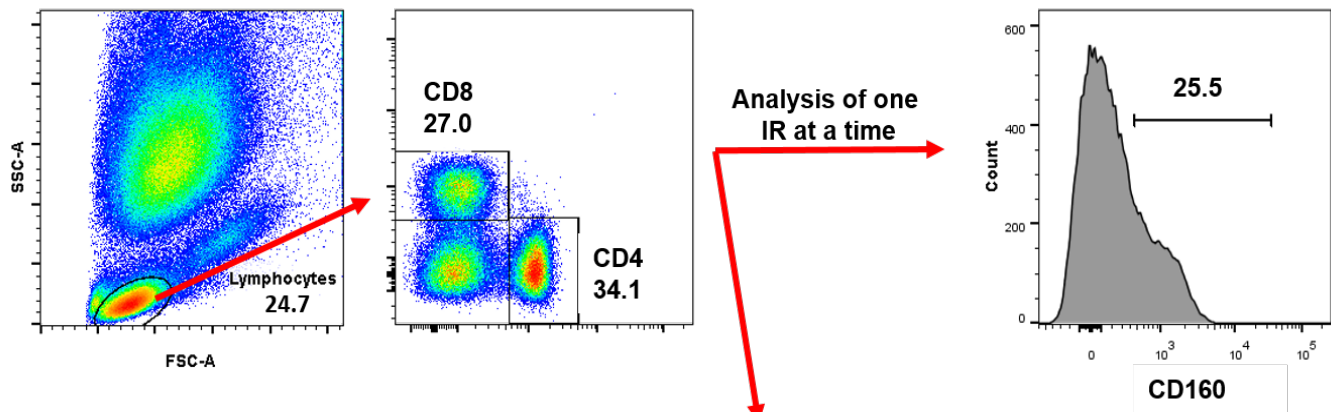

Multiparametric analysis

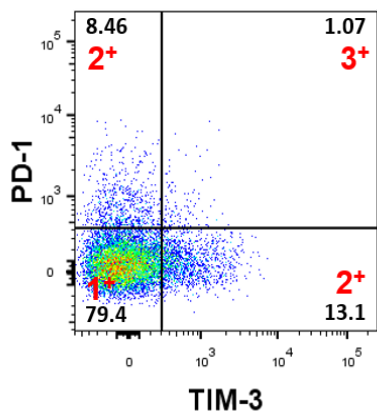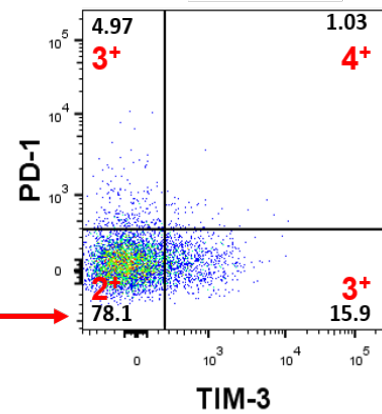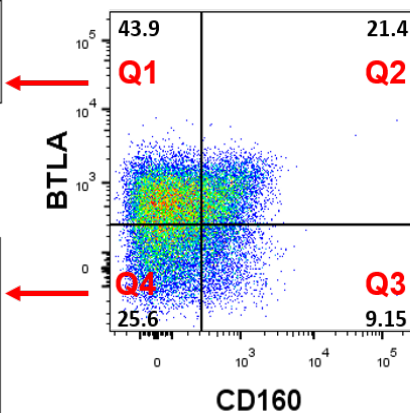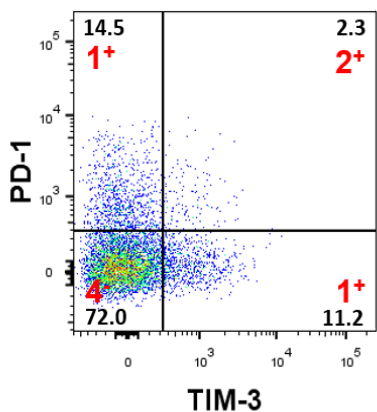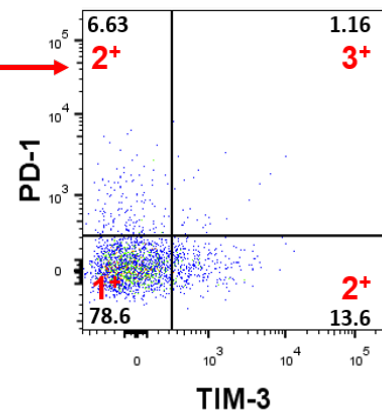

IRs:  
 CD160  
 BTLA  
 PD-1  
 TIM-3

Gate: CD8

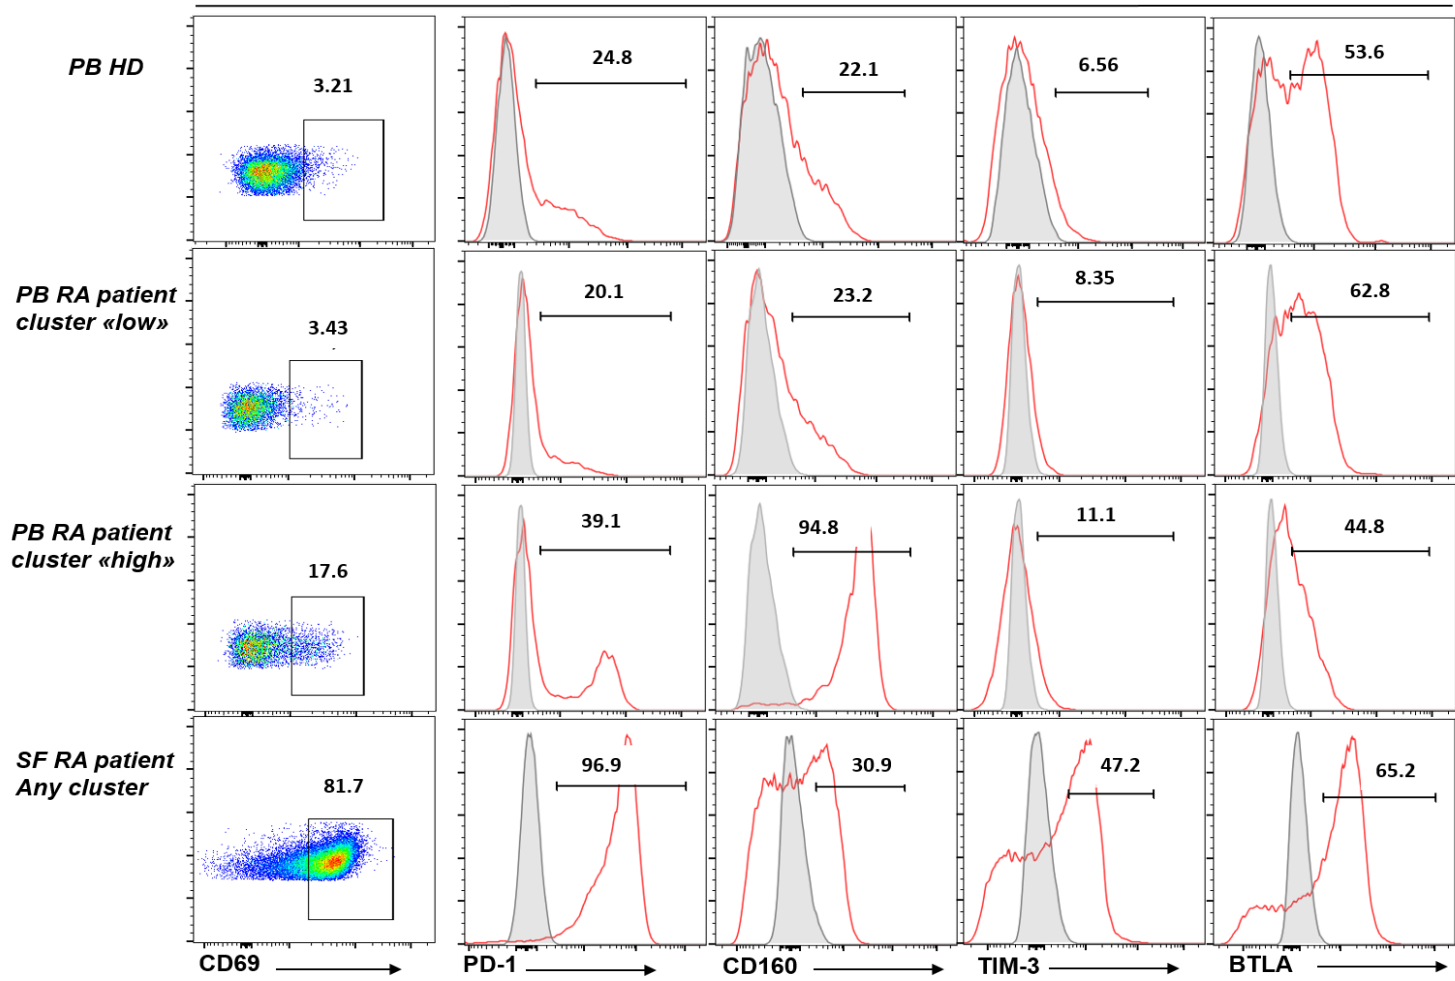

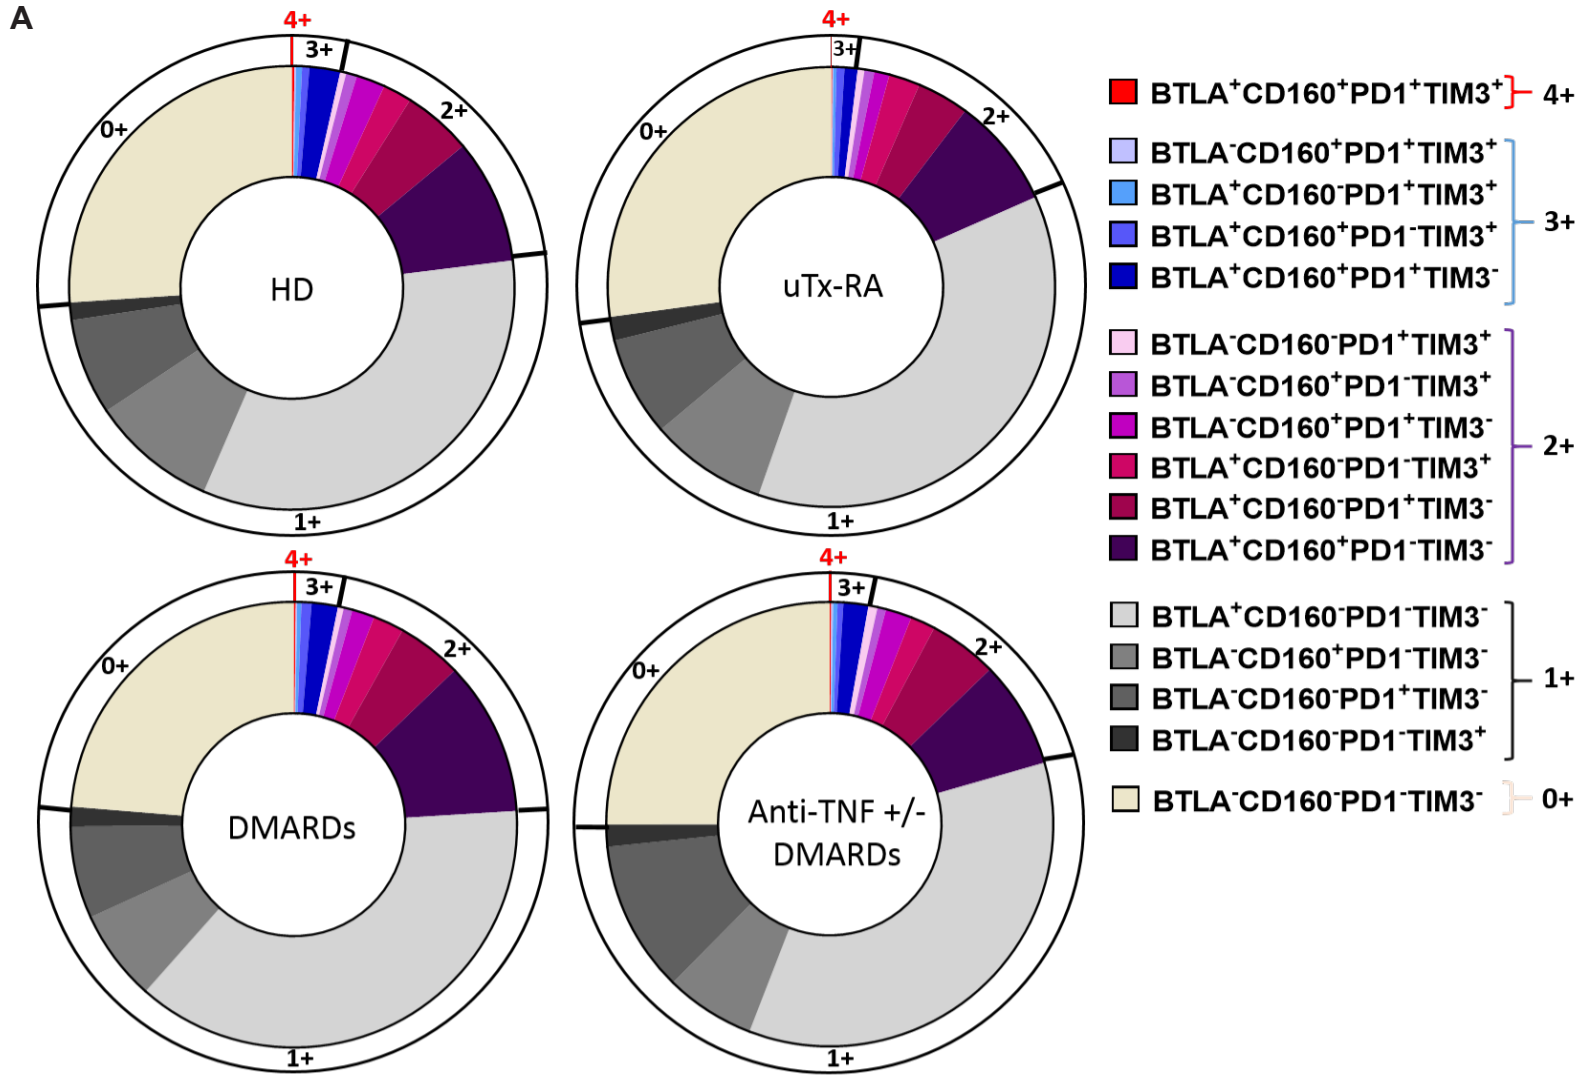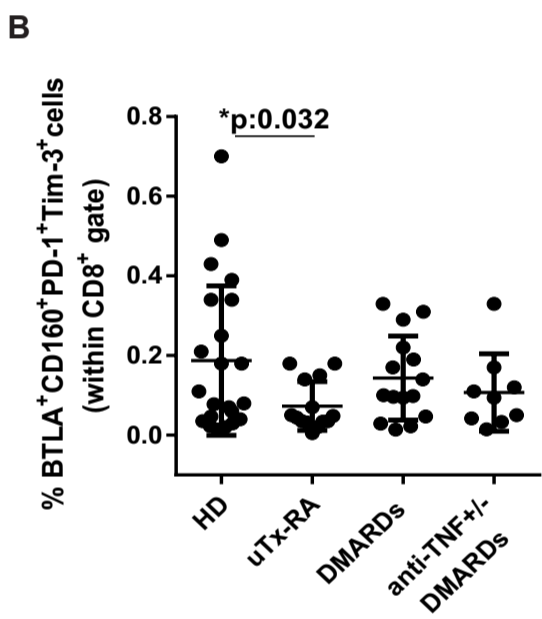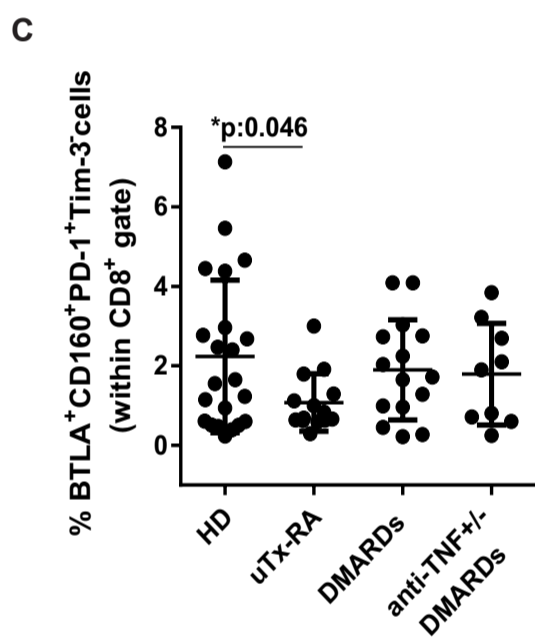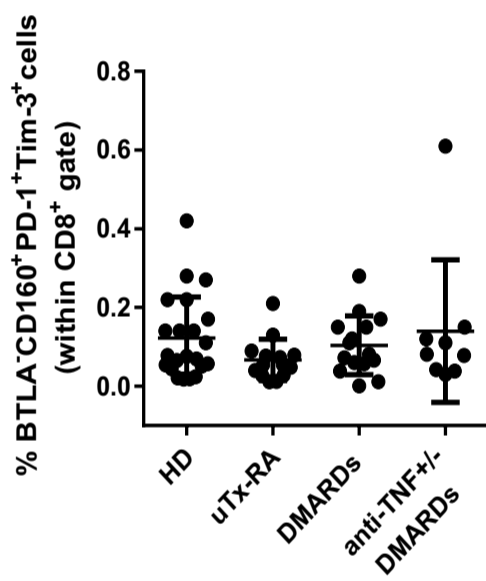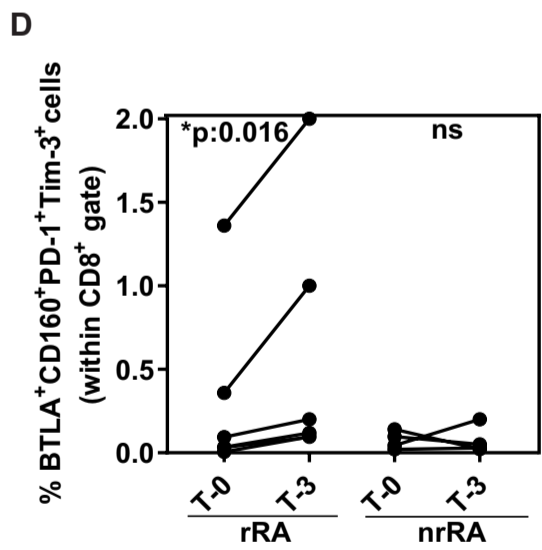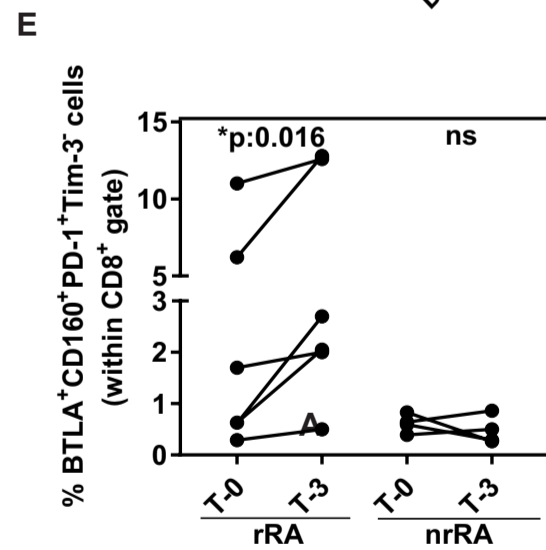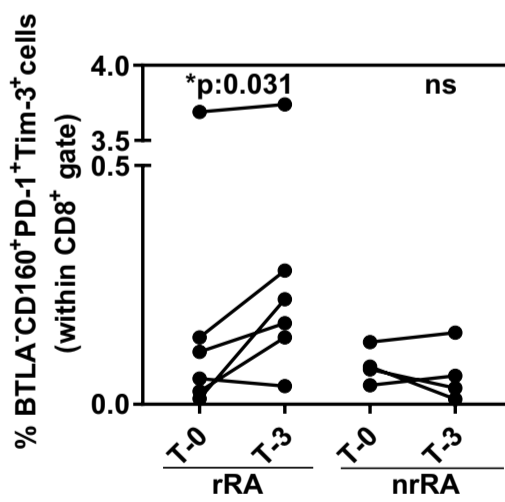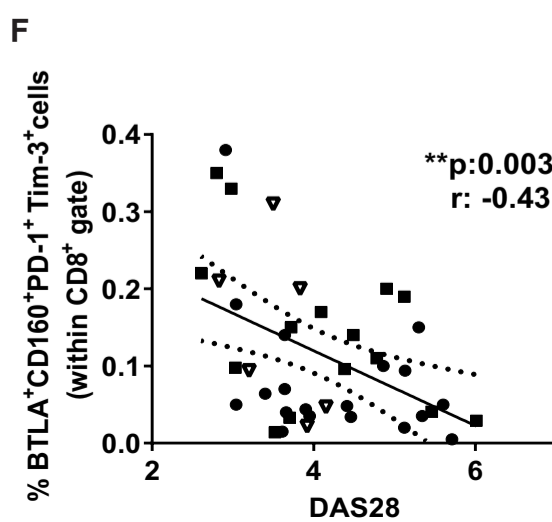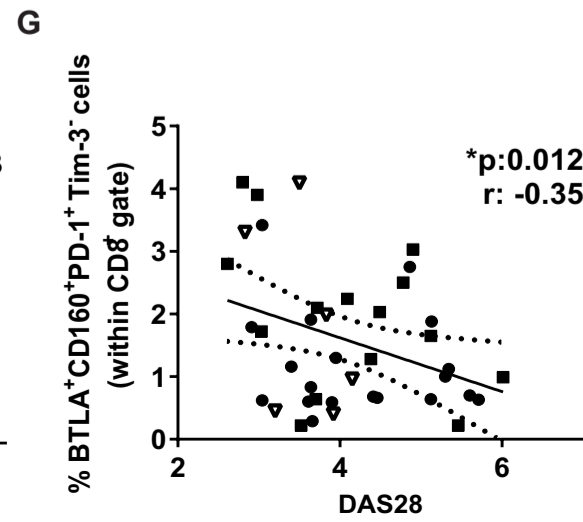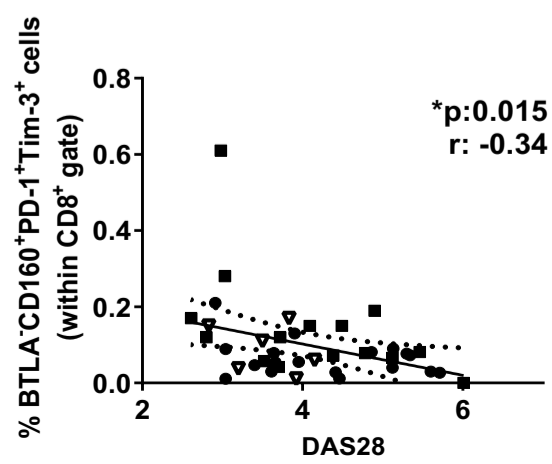

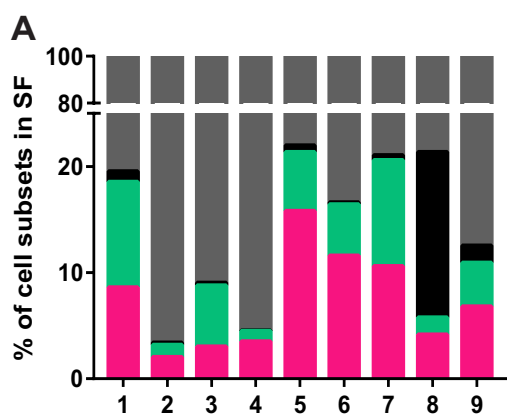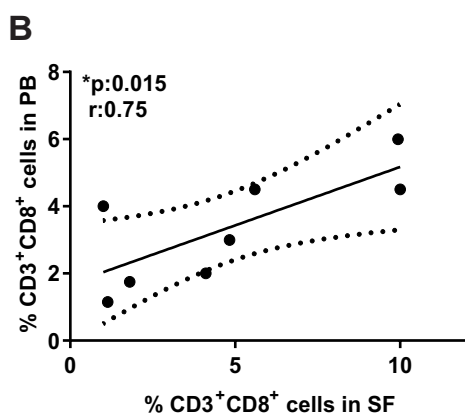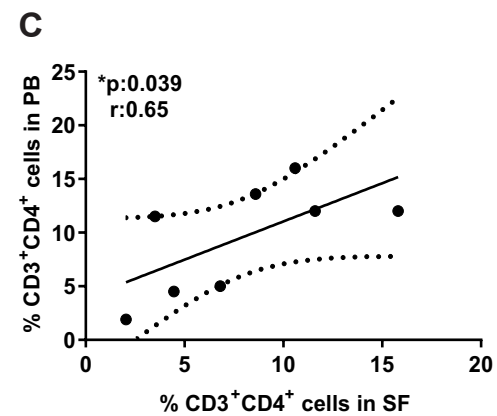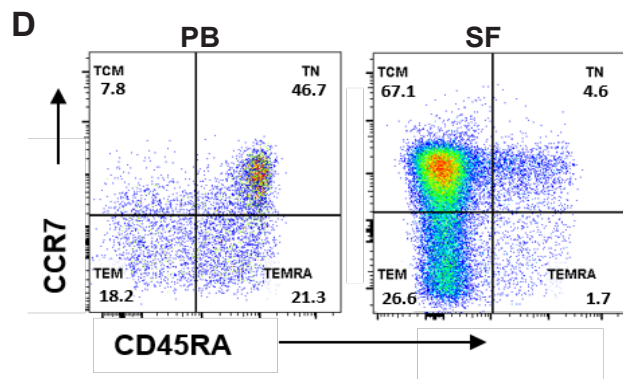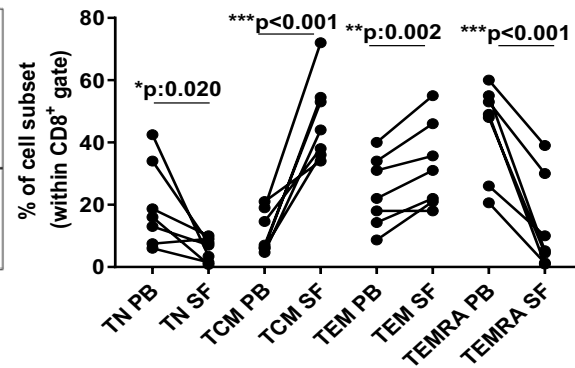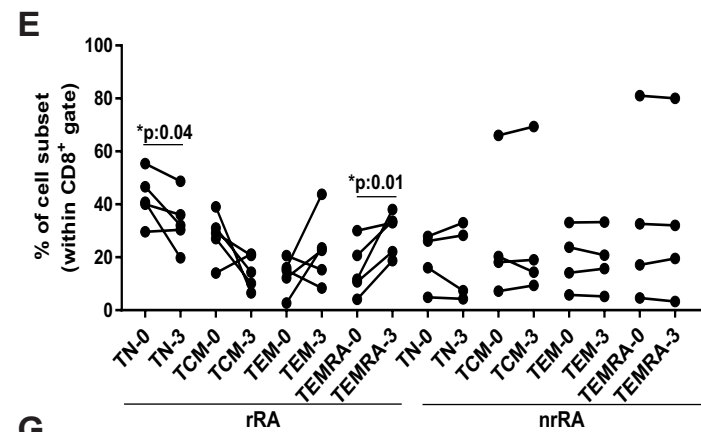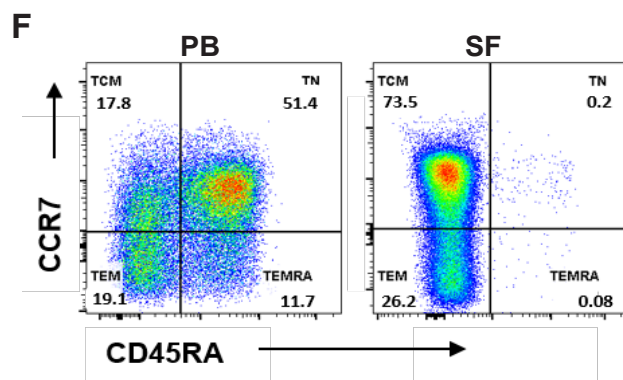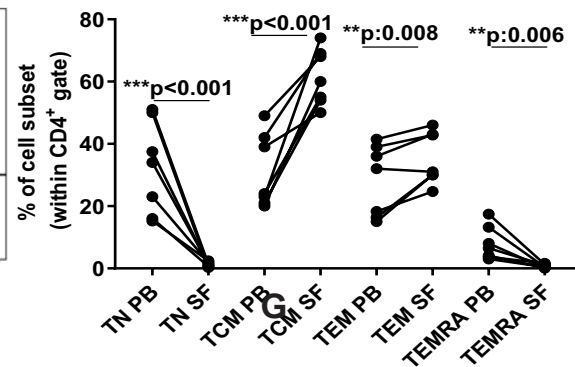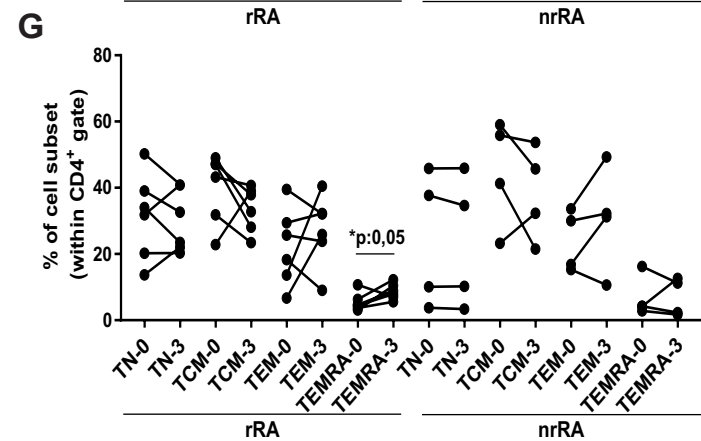

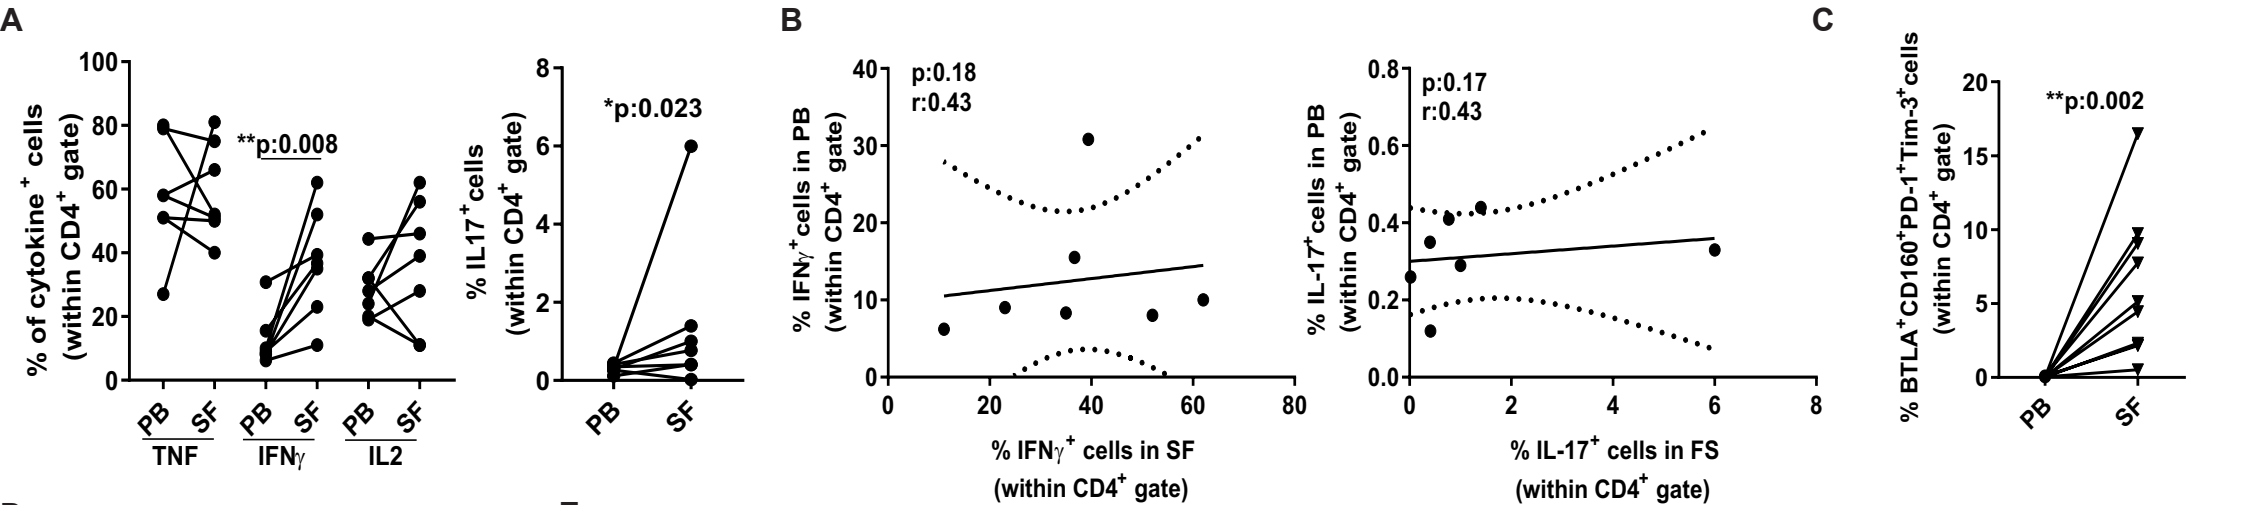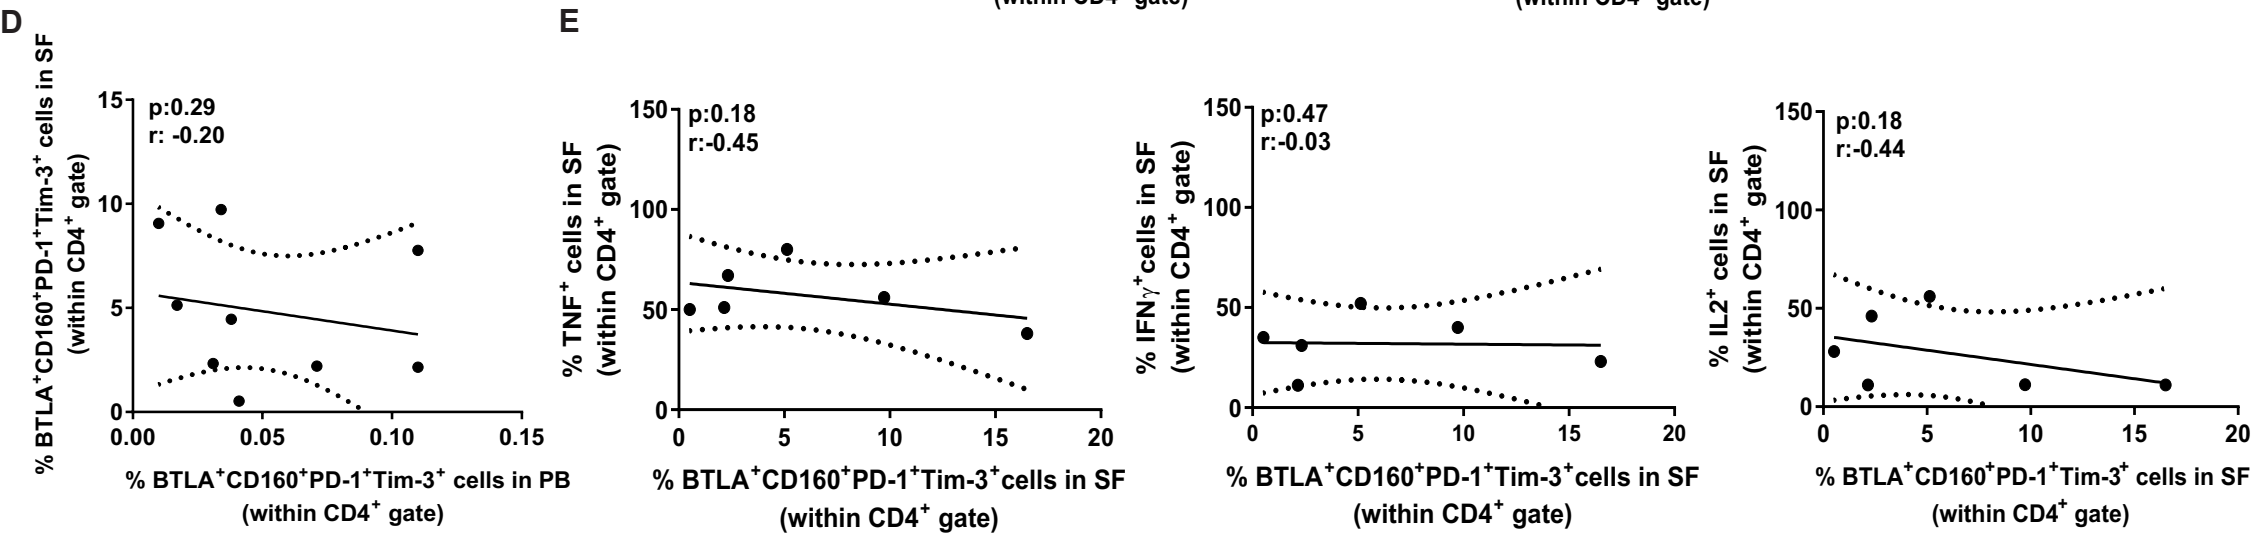

**A**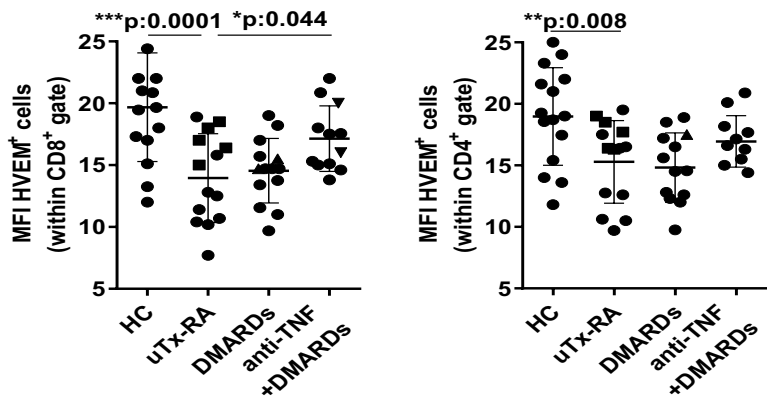**B**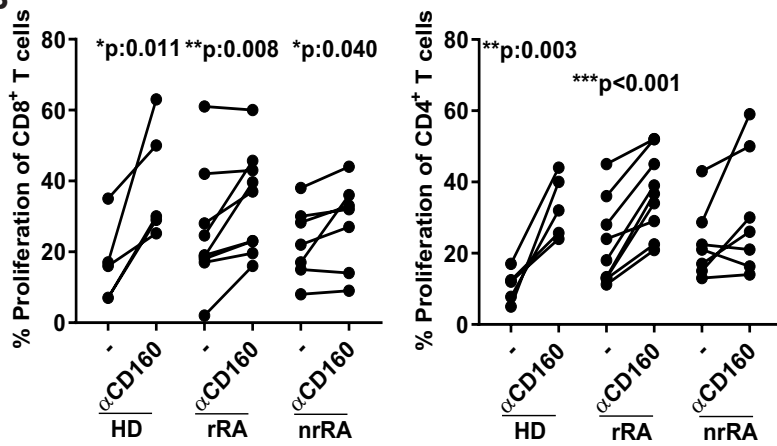**C**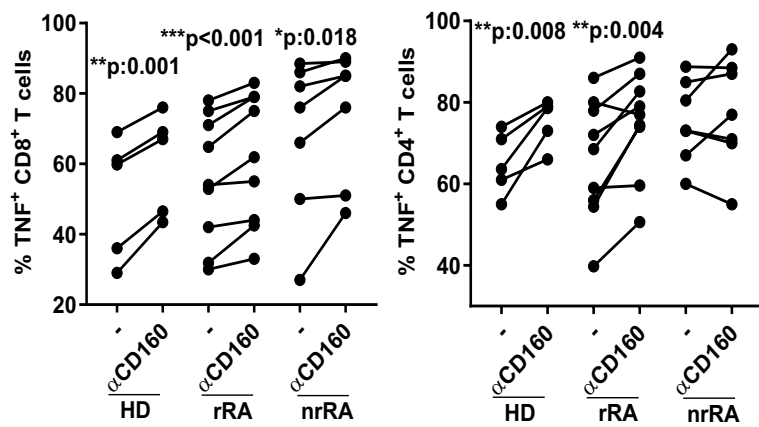**D**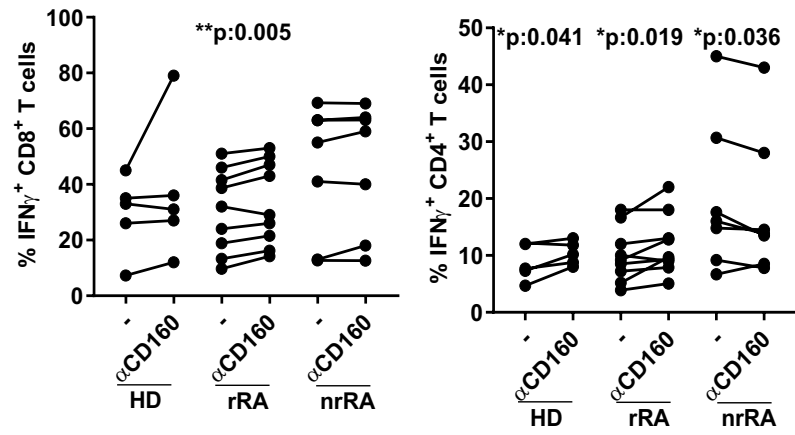**E**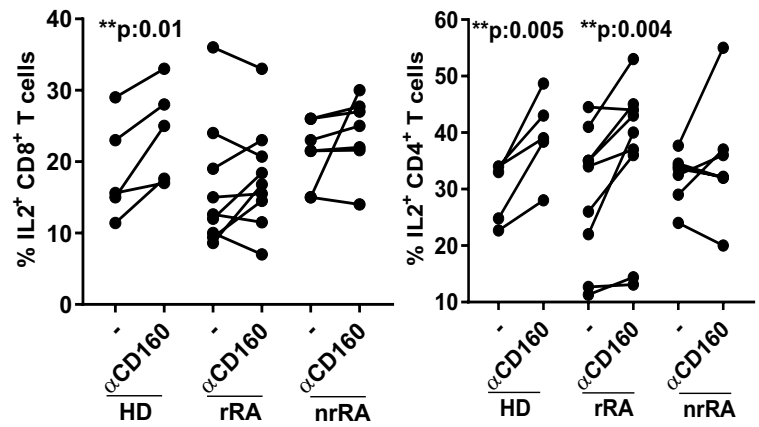

Supplement: NIHMS957237-supplement-Supp_figS1-6.pdf [file NIHMS957237-supplement-Supp_figS1-6.pdf]
